# Supplementary material for: Molecular effects of indoor tanning
Source: bioRxiv preprint, doi:10.1101/2024.06.04.597225, version 1 (2024-06-05)
Supplement: Figure S5 [file 597225_file11.pdf]

**Fig. S5**

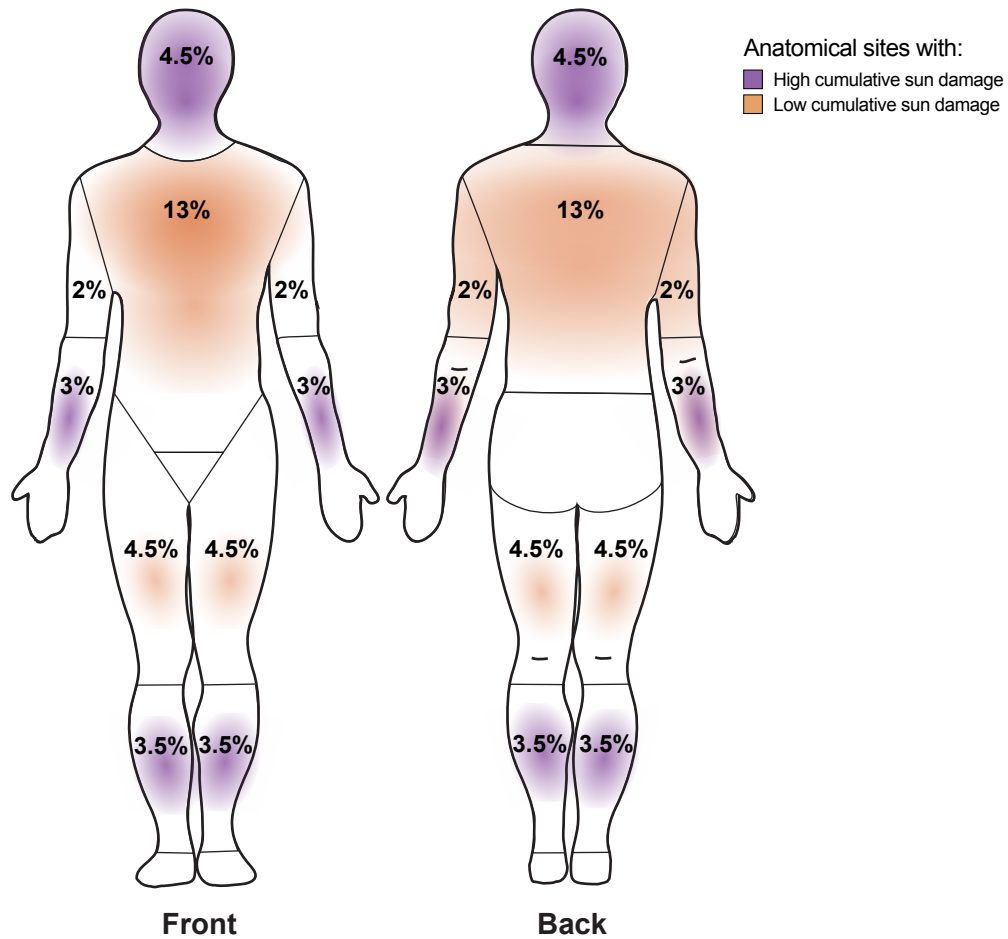

**Figure S5. Total body surface area in the regions with high (purple) and low (orange) cumulative sun damage (CSD).** The figure is based on Lund and Browder chart. The high CSD regions cover 35% and low CSD regions cover 52% of the body area. The remaining anatomical regions are considered sun shielded.
