# Supplementary material for: Molecular effects of indoor tanning
Source: PubMed Central journal article supplement — bioRxiv. 2024 Jun 5:2024.06.04.597225. Preprint. [Version 1] doi: 10.1101/2024.06.04.597225 (PMC11185634; doi:10.1101/2024.06.04.597225), 2024-06-05
Supplement: media-3.pdf [file media-3.pdf]

**Fig. S3**

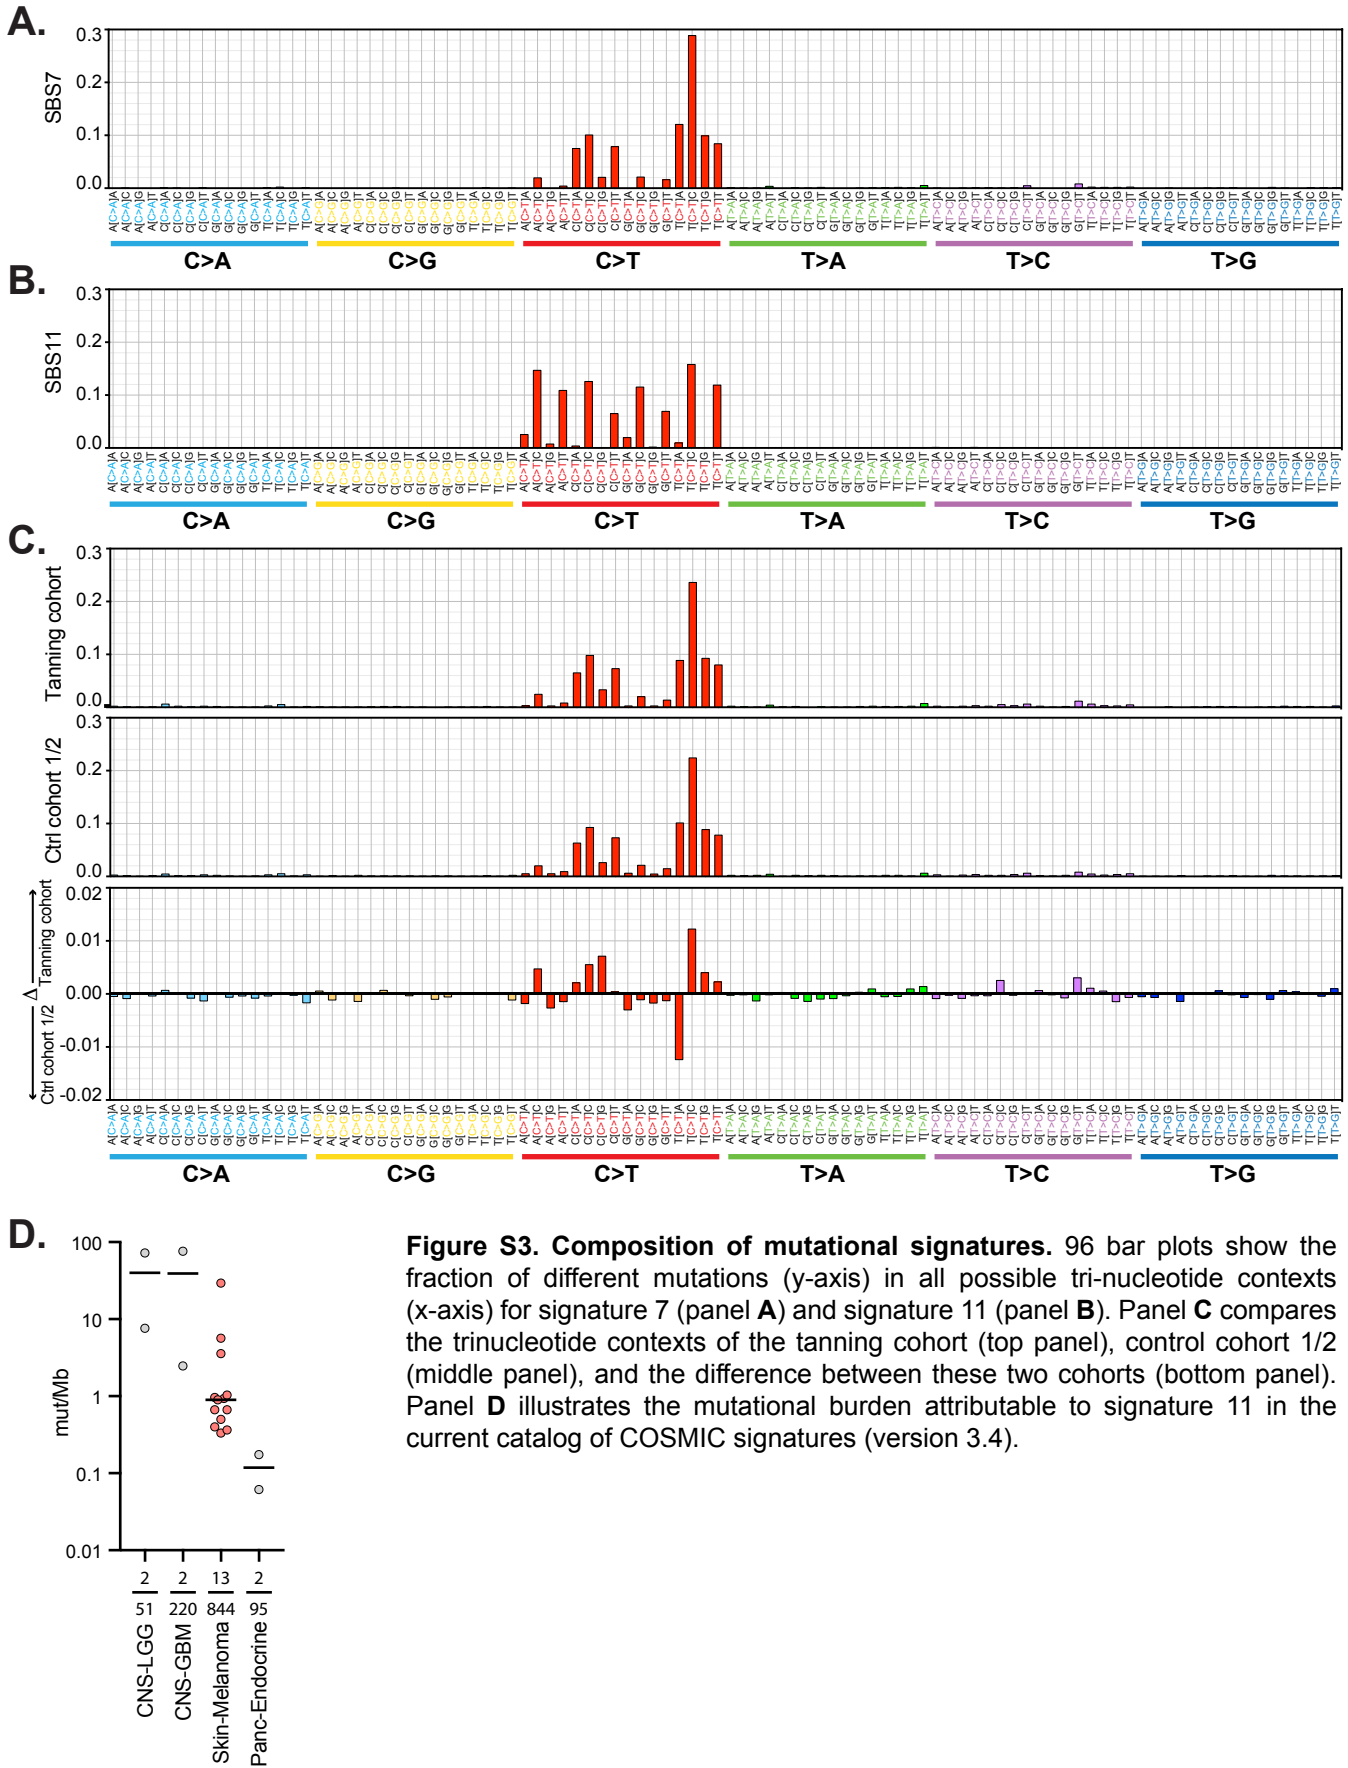

**Figure S3. Composition of mutational signatures.** 96 bar plots show the fraction of different mutations (y-axis) in all possible tri-nucleotide contexts (x-axis) for signature 7 (panel **A**) and signature 11 (panel **B**). Panel **C** compares the trinucleotide contexts of the tanning cohort (top panel), control cohort 1/2 (middle panel), and the difference between these two cohorts (bottom panel). Panel **D** illustrates the mutational burden attributable to signature 11 in the current catalog of COSMIC signatures (version 3.4).
